# Supplementary material
Source: MDPI journal article supplement (https://www.mdpi.com/2076-0760/9/4/60)
Supplement: s1 [file s1]

## Appendix A

A list of questions of the questionnaire which was sent through the Google Forms to the respondents (English version)

---

### English Names of Taiwanese Young Adults Survey

Dear respondent, thank you for taking the time to fill out this questionnaire. It is fully confidential, and the results will be used solely for our academic research. Please fill out as much of the survey as possible.

#### Part I Background information

**1. Age**

Your answer

**2. Gender**

Male       Female

**3. Your Chinese given name**

Your answer

**4. Education**

High school       Undergraduate       Graduate       Postgraduate

**5. Hometown**

Your answer

**6. Nationality**

Taiwanese

Other:

**7. Mother tongue**

8. Your second language (The language you have been learning the longest/are most proficient at)

English

Other:

9. How many years have you been learning English?

Your answer

10. Do you enjoy using English?

Yes

No

## Part II The acquisition and use of your English name(s)

11. Do you have an English name?

Yes

No

12. If you do not have an English name, please explain why.

Your answer

If you do not have or use an English name, you do not need to answer the following questions. Thank you very much for your cooperation.

13. When did you get your first English name and who gave it to you?

Your answer

14. What is your current English name?

Your answer

15. Is your current English name your first English name, or has it been changed several times already? If it has been changed, please explain why, when and who gave you the name(s) you had before.

Your answer

16. Did you decide which English name you would have?

Yes  No

17. Why do you have this particular name? How was its choice motivated?

Your answer

18. What were the occasions you used your English name just after you got it?

Friends  Parents  Teachers of other classes than English

During English classes  Other

19. Do your parents know your English name? Do they like it?

Your answer

20. Are you satisfied with your Chinese name? Explain why yes or no:

Your answer

**21. Are you satisfied with your English name? Would you like to change it? Why? Which name would you prefer and why?**

Your answer

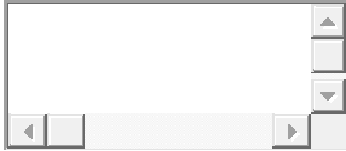

**22. Why do you use the English name and not only your Chinese name?**

Your answer



**23. What does the English name mean to you? Do you consider it:**

Name which is more important than your Chinese name

Name which is as important as your Chinese name

Name which is less important than your Chinese name

Nickname

Please explain your choice of the previous question.

Your answer

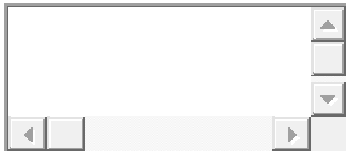

**24. Is there any official document which uses/displays your English name? Passport, ID, etc.?**

Your answer

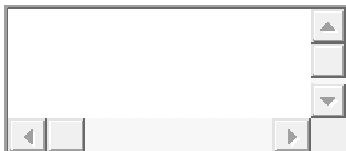

**25. Please specify how you are addressed by the following people:**

|                  | Parents | Partner | Close friends | Not very close friends | Colleagues | Teachers of English | Other teachers |
|------------------|---------|---------|---------------|------------------------|------------|---------------------|----------------|
| Chinese name     |         |         |               |                        |            |                     |                |
| English name     |         |         |               |                        |            |                     |                |
| Surname          |         |         |               |                        |            |                     |                |
| Chinese nickname |         |         |               |                        |            |                     |                |
| Full name        |         |         |               |                        |            |                     |                |
| Other            |         |         |               |                        |            |                     |                |

**26. If you would like to add some comment on your choice of the previous question, please write it here.**

Your answer

**27. What are the situations you would use your English name only? Why?**

Your answer

**28. What are the situations you would use your Chinese name only? Why?**

Your answer

**29. What are the main reasons for using your English name in communication with foreigners?  
Please explain as much as possible.**

Your answer

**30. What are the main reasons for using your English name in communication with other  
Taiwanese people? Please explain as much as possible.**

Your answer

**31. As a Taiwanese person, how do you feel about using an English name?**

Your answer

**This is the end of the questionnaire. If there is anything you would like to add about the use of your  
English name, please feel free to write as much as possible. Thank you very much for your time.**
